# Supplementary material
Source: publisher figshare collection journal article supplement (https://wiley.figshare.com/articles/dataset/_/3558912)
Supplement: Supplementary file 1 [file 1 › appendix-B.htm]

Ecological Archives E095-074-A2


*Ecological Archives* E095-074-A2

Philip A. Stephens, Alasdair I. Houston, Karin C. Harding, Ian L. Boyd, John M. McNamara. 2014. Capital and income breeding: the role of food supply. *Ecology* 95:882–896. http://dx.doi.org/10.1890/13-1434.1

Appendix B. Additional details on energetics and modeling.

> View / download PDF.


---

[Back to E095-074]
